# Supplementary material for: A Comparative Analysis of Constitutive Promoters Located in Adeno-Associated Viral Vectors
Source: PubMed Central journal article supplement (PMC4149579; doi:10.1371/journal.pone.0106472), 2014-08-29

Figure S1

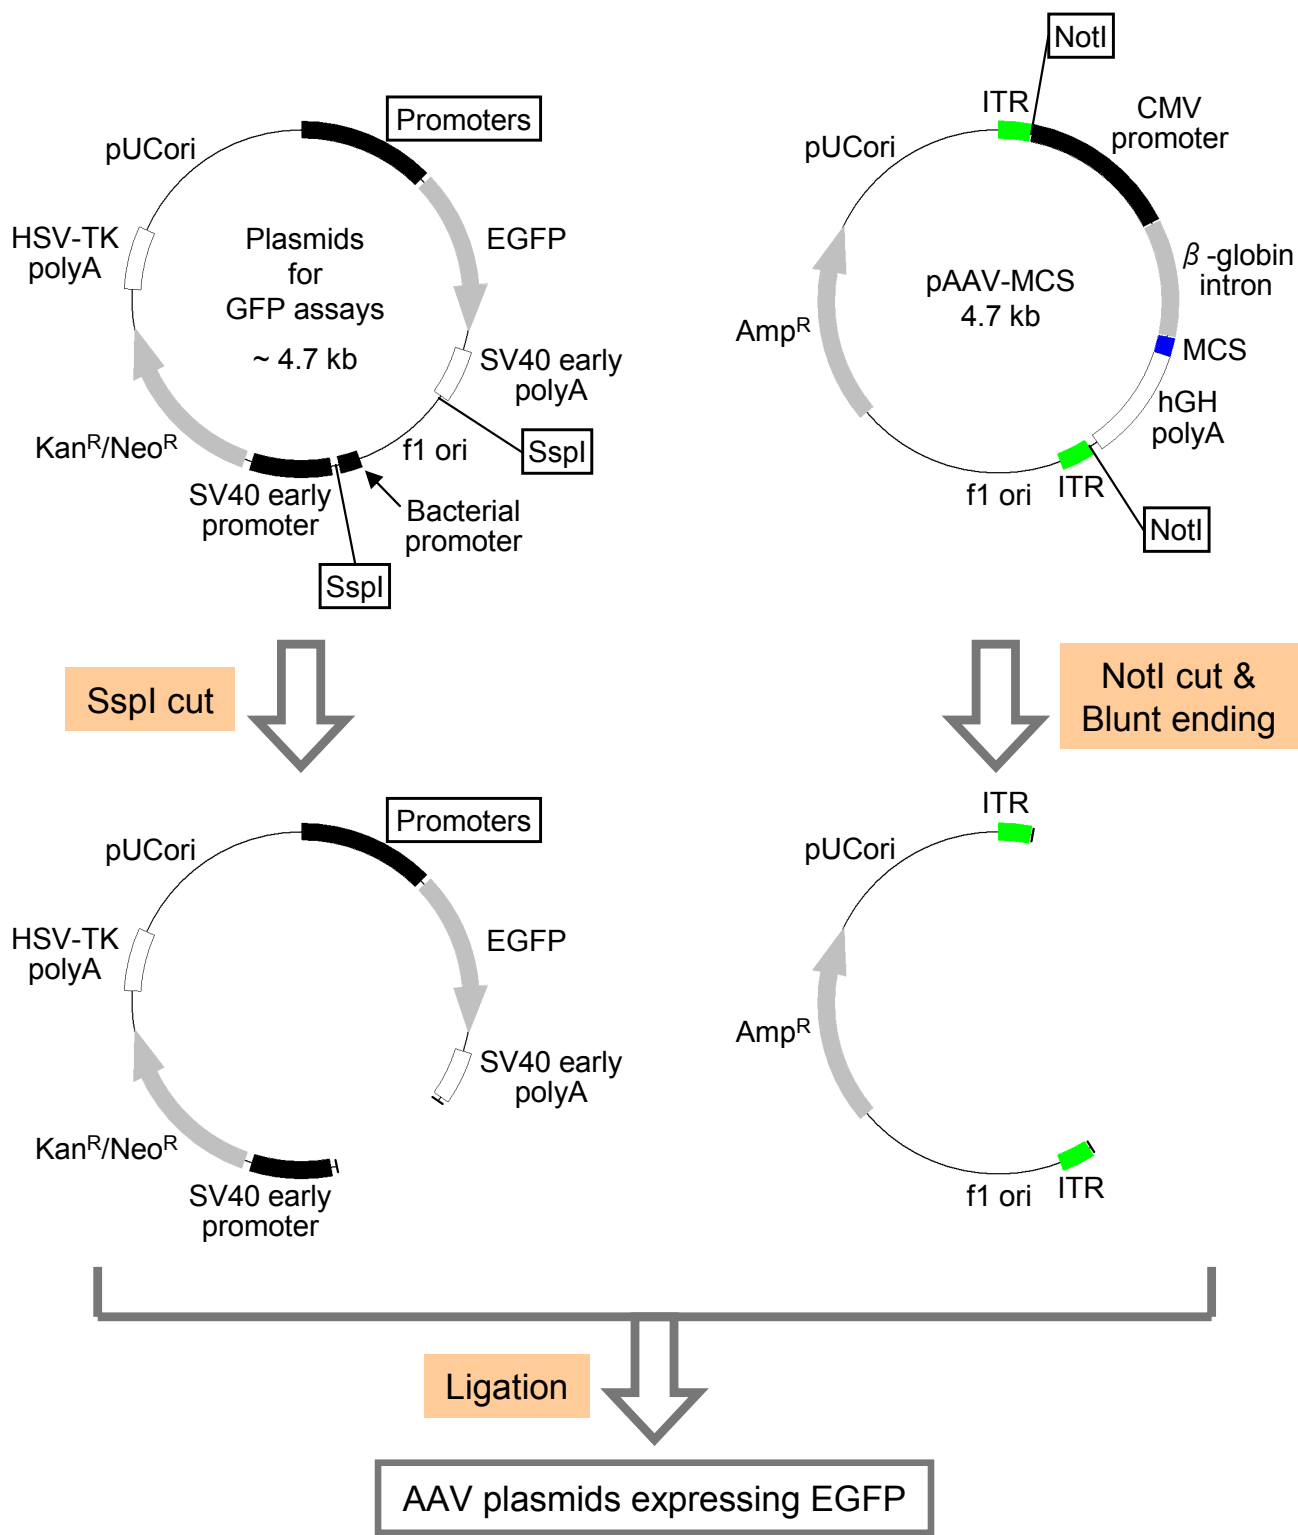

Supplement: pone.0106472.s001.pdf [file pone.0106472.s001.pdf]
