# Supplementary material for: A Comparative Analysis of Constitutive Promoters Located in Adeno-Associated Viral Vectors
Source: PubMed Central journal article supplement (PMC4149579; doi:10.1371/journal.pone.0106472), 2014-08-29
Supplement: pone.0106472.s006.pdf [file pone.0106472.s006.pdf]

**Table S1. Oligonucleotide Primers used for qRT-PCR**

| <i>Primers</i>     | <i>Sequences</i>     |
|--------------------|----------------------|
| <i>hCDKN2A</i> fwd | AACGCACCGAATAGTTACGG |
| <i>hCDKN2A</i> rev | ACCAGCGTGTCCAGGAAGCC |
| <i>hGAPDH</i> fwd  | GAGTCAACGGATTTGGTCGT |
| <i>hGAPDH</i> rev  | GACAAGCTTCCCGTTCTCAG |
